# Supplementary material
Source: PubMed Central journal article supplement (PMC5865422)
Supplement: 2017_180166-Disclosures_and_Contributios.pdf [file 2017_180166-Disclosures_and_Contributios.pdf]

Haematologica  
HAEMATOL/2017/180166  
Version 3

The use of romiplostim in treating chemotherapy-induced thrombocytopenia in patients with solid tumors

Hanny Al-Samkari, Ariela L Marshall, Katayoon Goodarzi, and David J Kuter

Disclosures: Hanny Al-Samkari: No disclosures. Ariela Marshall: No disclosures. Katayoon Goodarzi: No disclosures. David Kuter: Amgen (consulting income on this disease topic), Novartis (consulting income on this disease topic). No author received support, financial or otherwise, for the work under consideration for publication. No patents relevant to the work.

Contributions: HA, AM, and KG performed research, HA performed data analysis, HA and DK wrote the manuscript, and DK supervised the study.
